# Supplementary material
Source: ML conference proceedings conference paper supplement (https://proceedings.mlr.press/v80/lee18b.html)
Supplement: Supplementary file 1 [file lee18b-supp.zip]

Archive with 2 entries (2 files):
- appendix.pdf
- KR_DRL_MES_VS_jiritsukun17.mp4
