# Supplementary material
Source: ML conference proceedings conference paper supplement (https://proceedings.mlr.press/v80/lee18b.html)
Supplement: Supplementary file 1 [file lee18b-supp.zip › appendix.pdf]

## Appendix

| FEATURES         | # OF PLANES | DESCRIPTION                                                      |
|------------------|-------------|------------------------------------------------------------------|
| STONE COLOUR     | 3           | PLAYER STONE / OPPONENT STONE / EMPTY                            |
| ONES             | 1           | A CONSTANT PLANE FILLED WITH 1                                   |
| TURN NUM         | 8           | HOW MANY TURNS HAVE BEEN PROCEEDED IN ONE END                    |
| IN HOUSE         | 1           | WHETHER A GRID CELL INSIDE OF THE HOUSE IS OCCUPIED BY ANY STONE |
| ALL ORDER TO TEE | 8           | (IN TERMS OF ALL STONES) HOW CLOSE TO CENTER OF THE HOUSE        |
| OUR ORDER TO TEE | 4           | (IN TERMS OF OUR STONES) HOW CLOSE TO CENTER OF THE HOUSE        |
| OPP ORDER TO TEE | 4           | (IN TERMS OF OPPONENT STONES) HOW CLOSE TO CENTER OF THE HOUSE   |

Table 2. Input features used in our policy-value network
